# Supplementary material for: International Network for Comparison of HIV Neutralization Assays: The NeutNet Report
Source: PLoS One. 2009 Feb 20;4(2):e4505. doi: 10.1371/journal.pone.0004505 (PMC2640999; doi:10.1371/journal.pone.0004505)
Supplement: Table S1 — Characteristics of the PBMC based assays Footnote to Supplementary Table S1: 1 Stimulated prior freezing 2 number of donors used 3number of cells/ml of medium 4 only in medium of the neutralization assay 5 incubation time (hr) virus and inhibitory reagent of the neutralization assay 6 absorption time (hr) virus/inhibitory reagent mix on the cells before wash step 7 3 washes in case patient's sera/plasma are used 8 incubation time before virus infectivity is measured 9 culture period is 2 days for real-time PCR and 8 days for p24 antigen (0.02 MB XLS) [file pone.0004505.s002.xls]

## Sheet: Sheet1
Supplementary Table S1: Characteristics of the PBMC based assays
LAB	PBMC	#2 donor PBMC	PBMC selection	PBMC Activation3	PHA stimulation of PBMC	IL-2 stimulation of PBMC	Incubation phase5 (hr)	Absorption phase6	# wash	Culture period8 (days)	ELISA (read-out)
3B	Fresh	2	microscopically	1x106	2-3days at 5mg/ml	200U/ml (Chiron) after PHA stimulation4	1	overnight	2	7	in house p24 Gag
7	Frozen	2-5	only CCR5 wildtype	5x106	2-3days at 5mg/ml	10U/ml after PHA stimulation4	1	constant	no7	7 and 14	in house p24 Gag
5A	Frozen	1	screened for best viral growth out of several PBMC	3x106	1day at 1mg/ml;2-3 days at 0,3mg/ml	20U/ml; 2-3 days (Roche)	0.5	24 hr	3	4 or 6	p24 Gag (ABL)
8	Frozen1	5	screened for infectivity	10-20x106	3days at 1mg/ml prior cryopreservation	10ng/ml after thawing (R&D)	1	48 hr	no	2	Intra cellular p24 (flow cytometry)
11	Frozen	5	microscopically	1x106	2-3 days at 0,5mg/ml	10U/ml; 1 day	1	overnight	3	2 and 89	RT-PCR6(ARTUS) or p24 Gag 6(Organon Technica)
6B	Fresh	1	microscopically (out of 2)	1x106	2-3 days at 0,5mg/ml	200U/ml; 1 day (Gentaur)	24	1 hr	3	14	in house p24 Gag
Footnote to Supplementary Table S1:
1 Stimulated prior freezing
2 number of donors used
3number of cells/ml of medium
4 only in medium of the neutralization assay
5 incubation time (hr) virus and inhibitory reagent of the neutralization assay
6 absorption time (hr) virus/inhibitory reagent mix on the cells before wash step
7 3 washes in case patient's sera/plasma are used
8 incubation time before virus infectivity is measured
9 culture period is 2 days for real-time PCR and 8 days for p24 antigen
